# Supplementary material for: Nucleophilic activity of a linked bis{guanidine} leading to formation of a dicationic C4N4-heterocycle
Source: Royal Society of Chemistry journal article supplement (doi:10.1039/b715209d), 2007-01-01
Supplement: b715209d.pdf [file b715209d.pdf]

Supporting Information for:

**Nucleophilic activity of a linked bis{guanidine} leading to formation of a dicationic C<sub>4</sub>N<sub>4</sub>-heterocycle**

Martyn P. Coles, Steven F. Lee, Sarah H. Oakley, Guillermina Estiu, and Peter B. Hitchcock<sup>†</sup>

*Department of Chemistry, University of Sussex, Falmer, Brighton BN1-9QJ, UK Department of Chemistry and Biochemistry, University of Notre Dame, Notre Dame, IN 46556-5670, USA*

Contents:

- pS2 Synthesis of [H<sub>2</sub>C{hpp}<sub>2</sub>CH<sub>2</sub>][Cl]<sub>2</sub> (**2a-H<sub>2</sub>**).
- pS2 Synthesis of [H<sub>2</sub>C{hpp}<sub>2</sub>CH<sub>2</sub>][BPh<sub>4</sub>]<sub>2</sub> (**2b**).
- pS3 General procedure for the preparation of [H<sub>2</sub>C{hppR}<sub>2</sub>][X]<sub>2</sub>.
- pS3 General procedure for the preparation of {H<sub>2</sub>C{hppR}<sub>2</sub>}[BPh<sub>4</sub>]<sub>2</sub>.
- pS3 Characterizing data for [H<sub>2</sub>C{hppMe<sub>2</sub>}]<sub>2</sub> (**3a**).
- pS3 Characterizing data for [H<sub>2</sub>C{hppCH<sub>2</sub>Ph}<sub>2</sub>][BPh<sub>4</sub>]<sub>2</sub> (**4b**).
- pS4 Reaction of H<sub>2</sub>C{hpp}<sub>2</sub> with Me<sub>2</sub>CHI.
- pS5 Optimized coordinates for 'chair'-conformation (**A**)
- pS6 Optimized coordinates for 'twist-boat'-conformation (**C**)
- pS7 Optimized coordinates for transition-state (**B**)
- pS8 ORTEP for [H<sub>2</sub>C{hpp}<sub>2</sub>CH<sub>2</sub>][BPh<sub>4</sub>]<sub>2</sub> (**2b**)
- pS9 ORTEP for [H<sub>2</sub>C{hppCH<sub>2</sub>Ph}<sub>2</sub>][BPh<sub>4</sub>]<sub>2</sub> (**4b**)

$[H_2C\{hpp\}_2CH_2][Cl]_2$  (**2a-H<sub>2</sub>**)

$H_2C\{hpp\}_2$  (**1**, 1.00g, 3.44 mmol) was dissolved in  $CH_2Cl_2$  (~ 2 mL) and left at room temperature for 3 days, during which time colourless crystals deposited from solution. Yield 0.77 g, (41 %, calculated for the bis-dichloromethane solvate). Elemental analysis calcd (%) for  $C_{16}H_{28}Cl_2N_6 \cdot 2(CH_2Cl_2)$  (542.08): C 39.85, H 5.95, N 15.50; found: C 39.73, H 6.18, N 15.41. **2a-H<sub>2</sub>**:  $^1H$  NMR (500 MHz,  $D_2O$ , 298 K): Major Isomer:  $\delta$  5.15 and 4.22 (d,  $^2J_{HH} = 15.6$ , exocyclic  $CH_2$ ). Minor Isomer:  $\delta$  5.31 and 4.31 (d,  $^2J_{HH} = 15.8$ , exocyclic  $CH_2$ ). The remaining methylene groups of the bicyclic framework overlap in the following regions:  $\delta$  3.43 (m, 4H, hpp- $CH_2$ ), 3.29 (m, 8H, hpp- $CH_2$ ), 3.20 (m, 4H, hpp- $CH_2$ ), 1.88 (m, 8H, hpp- $CH_2$ ).  $^{13}C$  NMR (125 MHz,  $D_2O$ , 298 K):  $\delta$  160.8 ( $CN_3$ ), 152.0 ( $CN_3$ ), 74.8 (exocyclic  $CH_2$ ), 68.1 (exocyclic  $CH_2$ ), 47.5 (hpp- $CH_2$ ), 47.4 (hpp- $CH_2$ ), 47.2 (hpp- $CH_2$ ), 21.4 (hpp- $CH_2$ ), 21.1 (hpp- $CH_2$ ). **2a-D<sub>2</sub>**: [ $^2H$ ]- NMR (76.8 MHz,  $D_2O$ , 298 K): 5.05 (br,  $CD_2$ ), 4.13 (br,  $CD_2$ ).

$[H_2C\{hpp\}_2CH_2][BPh_4]_2$  (**2b**)

A solution of  $NaBPh_4$  (0.25 g, 0.73 mmol) in 2 mL  $H_2O$  was added *via* syringe to **2a-H<sub>2</sub>** (0.20 g, 0.37 mmol) in 1 mL  $H_2O$ , causing the immediate precipitation of a white solid. The product was isolated by filtration and purified by slow cooling of a saturated MeCN solution, affording pure **2b** as colourless prisms. Yield 0.25 g, (72 %). Elemental analysis calcd (%) for  $C_{64}H_{68}B_2N_6$  (931.56): C 81.53, H 7.21, N 8.92; found: C 81.46, H 7.25, N 8.89.  $^1H$  NMR (300 MHz,  $CD_3CN$ , 298 K): Anion resonances:  $\delta$  7.25 (br m, 16H, *o*- $C_6H_5$ ), 6.99 (t,  $^3J_{HH} = 7.40$ , 16H, *m*- $C_6H_5$ ), 6.83 (t,  $^3J_{HH} = 7.22$ , 8H, *p*- $C_6H_5$ ). Major Isomer:  $\delta$  5.06 and 4.15 (d,  $^2J_{HH} = 15.7$ , exocyclic  $CH_2$ ). Minor Isomer: 5.17 and 4.20 (d,  $^2J_{HH} = 15.9$ , exocyclic  $CH_2$ ). The remaining methylene groups of the bicyclic framework overlap in the following regions:  $\delta$  3.42 (m, 4H, hpp- $CH_2$ ), 3.34 (m, 8H, hpp- $CH_2$ ), 3.26 (m, 4H, hpp- $CH_2$ ), 1.93 (m, 8H, hpp- $CH_2$ ).  $^{13}C$  NMR (75 MHz,  $CD_3CN$ , 353 K):  $\delta$  164.2 (q,  $^1J_{CB} = 49.1$ , *i*- $C_6H_5$ ), 161.4 ( $CN_3$ ), 136.1 ( $C_6H_5$ ), 125.8 (q,  $J_{CB} = 2.7$ ,  $C_6H_5$ ), 122.0 ( $C_6H_5$ ), 75.4 (exocyclic  $CH_2$ ), 68.7 (exocyclic  $CH_2$ ), 48.1 (hpp- $CH_2$ ), 48.0 (hpp- $CH_2$ ), 47.9 (hpp- $CH_2$ ), 47.8 (hpp- $CH_2$ ), 21.9 (hpp- $CH_2$ ), 21.6 (hpp- $CH_2$ ).

**General procedure for the preparation of  $[H_2C\{hppR\}_2][X]_2$**

A sample of **1** was dissolved in neat R–X reagent and stirred for 1-3 days. Addition of Et<sub>2</sub>O resulted in formation of a white solid that was separated from excess RX by filtration.

**General procedure for the preparation of  $\{H_2C\{hppR\}_2\}[BPh_4]_2$**

A solution of two equivalents of NaBPh<sub>4</sub> in H<sub>2</sub>O was added to an aqueous stirred solution of  $\{H_2C\{hppR\}_2\}[X]_2$ . The product generally precipitated from the reaction mixture and was isolated by filtration. Purification was achieved by crystallization, as detailed below:

**$[H_2C\{hppMe\}_2][I]_2$  (**3**).**

Compound **3a** was purified by crystallization from MeOH at -30 °C. Yield 98 %. Elemental analysis calcd (%) for C<sub>17</sub>H<sub>32</sub>N<sub>6</sub>I<sub>2</sub> (574.08): C 35.54, H 5.62, N 14.64; found: C 35.65, H 5.72, N 14.53. <sup>1</sup>H NMR (300 MHz, D<sub>2</sub>O, 298 K): δ 4.72 (s, 2H, H<sub>2</sub>C{hppMe}<sub>2</sub>), 3.38 (m, 8H, hpp-CH<sub>2</sub>), 3.20 (m, 8H, hpp-CH<sub>2</sub>), 2.91 (s, 6H, hppMe), 1.96 (m, 8H, hpp-CH<sub>2</sub>). <sup>13</sup>C NMR (75 MHz, D<sub>2</sub>O, 298 K): δ 158.2 (CN<sub>3</sub>), 66.1 (H<sub>2</sub>C{hppMe}<sub>2</sub>), 48.9 (hpp-CH<sub>2</sub>), 48.3 (hpp-CH<sub>2</sub>), 48.1 (hpp-CH<sub>2</sub>), 44.1 (hpp-CH<sub>2</sub>), 41.6 (hppMe), 21.4 (hpp-CH<sub>2</sub>), 20.6 (hpp-CH<sub>2</sub>).

**$[H_2C\{hppCH_2Ph\}_2][BPh_4]_2$  (**4b**).**

Compound **4b** was purified by crystallization from MeOH / acetone at room temperature. Yield 65 %. Elemental analysis calcd (%) for C<sub>77</sub>H<sub>80</sub>B<sub>2</sub>N<sub>6</sub> (1111.12): C 83.19, H 7.26, N 7.56; found: C 83.23, H 7.30, N 7.61. <sup>1</sup>H NMR (300 MHz, D<sub>6</sub>-acetone, 298 K): Anion resonances: δ 7.36 (br m, 16H, *o*-C<sub>6</sub>H<sub>5</sub>), 6.95 (t, <sup>3</sup>J<sub>HH</sub> = 7.38, 16H, *m*-C<sub>6</sub>H<sub>5</sub>), 6.81 (t, <sup>3</sup>J<sub>HH</sub> = 7.19, 8H, *p*-C<sub>6</sub>H<sub>5</sub>). Cation resonances: δ 7.41 (m, 6H, *m*- and *p*-C<sub>6</sub>H<sub>5</sub>), 7.27 (d, <sup>3</sup>J<sub>HH</sub> = 7.50, 4H, *o*-C<sub>6</sub>H<sub>5</sub>), 5.01 (s, 2H, H<sub>2</sub>C{hppCH<sub>2</sub>Ph}<sub>2</sub>), 4.44 (s, 4H, hppCH<sub>2</sub>Ph), 3.49 (m, 12H, hpp-CH<sub>2</sub>), 3.27 (m, 4H, hpp-CH<sub>2</sub>), 2.14 (m, 4H, hpp-CH<sub>2</sub>), 1.88 (m, 4H, hpp-CH<sub>2</sub>). <sup>13</sup>C NMR (75 MHz, D<sub>6</sub>-acetone, 273K): δ 164.6 (q, <sup>1</sup>J<sub>CB</sub> = 49.1, *i*-C<sub>6</sub>H<sub>5</sub>-BPh<sub>4</sub>), 158.9 (CN<sub>3</sub>), 136.6 (C<sub>6</sub>H<sub>5</sub>-BPh<sub>4</sub>), 135.1 (CH<sub>2</sub>Ph), 129.8 (CH<sub>2</sub>Ph), 128.8 (CH<sub>2</sub>Ph), 127.6 (CH<sub>2</sub>Ph), 125.7 (q, J<sub>CB</sub> = 2.8, C<sub>6</sub>H<sub>5</sub>-BPh<sub>4</sub>), 122.0 (C<sub>6</sub>H<sub>5</sub>), 66.2 (H<sub>2</sub>C{hppCH<sub>2</sub>Ph}<sub>2</sub>), 57.0 (H<sub>2</sub>C{hppCH<sub>2</sub>Ph}<sub>2</sub>), 49.5 (hpp-CH<sub>2</sub>), 48.8 (hpp-CH<sub>2</sub>), 46.1 (hpp-CH<sub>2</sub>), 44.1 (hpp-CH<sub>2</sub>), 22.0 (hpp-CH<sub>2</sub>), 20.9 (hpp-CH<sub>2</sub>).

### **Reaction of $H_2C\{hpp\}_2$ with $Me_2CHI$**

Excess  $Me_2CHI$  was added to an NMR tube containing a solution of  $H_2C\{hpp\}_2$  in  $CD_3CN$  and the sample was sealed. After 15h the  $^1H$  NMR spectrum showed 100% conversion to a new guanidine containing species, with resonances at  $\delta$  6.07 (m, 1H, =CHMe), 5.29-5.13 (m, 2H, =CH<sub>2</sub>) and 1.37 (d,  $J$  = 6.6 Hz, =CHMe) corresponding to propene.

$^1H$  NMR (300 MHz,  $CD_3CN$ , 298 K):  $\delta$  5.19 (s, 2H,  $H_2C\{hpp\}\{hppH\}$ ), 3.63 (m, 4H, hpp-CH<sub>2</sub>), 3.51 (m, 4H, hpp-CH<sub>2</sub>), 3.41 (m, 8H, hpp-CH<sub>2</sub>), 2.17 (m, 8H, hpp-CH<sub>2</sub>).<sup>‡</sup>  $^{13}C$  NMR (75 MHz,  $CD_3CN$ , 298 K):  $\delta$  152.2 (CN<sub>3</sub>), 66.6 ( $H_2C\{hpp\}\{hppH\}$ ), 48.2 (hpp-CH<sub>2</sub>), 48.0 (hpp-CH<sub>2</sub>), 47.7 (hpp-CH<sub>2</sub>), 41.0 (hpp-CH<sub>2</sub>), 22.5 (hpp-CH<sub>2</sub>), 22.2 (hpp-CH<sub>2</sub>).

(<sup>‡</sup> resonance corresponding to the NH proton(s) not observed).

**Optimized coordinates for 'chair'-conformation (red)**

|   |           |           |           |
|---|-----------|-----------|-----------|
| 1 | 2.241790  | 1.229019  | -2.511783 |
| 1 | -2.213321 | 1.188580  | -2.555799 |
| 1 | 1.332151  | 2.624797  | -1.935761 |
| 1 | -1.337054 | 2.599384  | -1.965057 |
| 1 | -3.847433 | 2.909408  | -1.682427 |
| 1 | 3.831294  | 2.974299  | -1.605982 |
| 6 | 1.993604  | 1.816288  | -1.621033 |
| 6 | -1.991413 | 1.780894  | -1.661437 |
| 1 | 4.671352  | 0.756373  | -1.348391 |
| 1 | -4.656649 | 0.678709  | -1.438617 |
| 6 | -3.267965 | 2.286278  | -0.995126 |
| 6 | 3.249089  | 2.341155  | -0.930209 |
| 1 | 0.020345  | -1.217511 | -0.970913 |
| 7 | 1.248204  | 0.957376  | -0.670783 |
| 6 | -4.109060 | 1.085025  | -0.580675 |
| 1 | -4.818233 | -1.436605 | -0.276478 |
| 6 | 4.101393  | 1.153237  | -0.500818 |
| 7 | -1.250432 | 0.935154  | -0.696096 |
| 1 | -3.012889 | 2.905517  | -0.127819 |
| 1 | 4.844825  | -1.357225 | -0.182782 |
| 1 | 2.967622  | 2.955200  | -0.067408 |
| 1 | -0.020056 | 2.533977  | -0.209820 |
| 1 | -4.844826 | 1.357225  | 0.182782  |
| 7 | 3.289707  | 0.027444  | 0.031940  |
| 6 | -0.011652 | 1.448086  | -0.094265 |
| 6 | 1.957977  | 0.016878  | 0.019379  |
| 7 | -3.289708 | -0.027444 | -0.031940 |
| 1 | -2.967623 | -2.955200 | 0.067407  |
| 1 | 3.012888  | -2.905517 | 0.127819  |
| 6 | -1.957978 | -0.016878 | -0.019380 |
| 1 | 4.818232  | 1.436605  | 0.276477  |
| 6 | 0.011651  | -1.448086 | 0.094265  |
| 6 | -4.101394 | -1.153237 | 0.500818  |
| 1 | 0.020055  | -2.533977 | 0.209819  |
| 6 | 4.109059  | -1.085025 | 0.580675  |
| 7 | 1.250431  | -0.935154 | 0.696095  |
| 6 | -3.249090 | -2.341155 | 0.930209  |
| 6 | 3.267964  | -2.286278 | 0.995126  |
| 7 | -1.248205 | -0.957376 | 0.670783  |
| 1 | -4.671352 | -0.756373 | 1.348390  |
| 1 | -0.020345 | 1.217511  | 0.970912  |
| 1 | 4.656649  | -0.678709 | 1.438617  |
| 1 | -3.831294 | -2.974299 | 1.605982  |
| 1 | 3.847432  | -2.909408 | 1.682427  |
| 6 | 1.991412  | -1.780894 | 1.661436  |
| 6 | -1.993605 | -1.816288 | 1.621033  |
| 1 | 1.337053  | -2.599384 | 1.965057  |
| 1 | -1.332152 | -2.624797 | 1.935760  |
| 1 | -2.241791 | -1.229019 | 2.511783  |
| 1 | 2.213321  | -1.188580 | 2.555799  |

**Optimized coordinates for 'twist-boat'-conformation (blue)**

|   |           |           |           |
|---|-----------|-----------|-----------|
| 6 | -4.193875 | -1.089502 | 2.176698  |
| 6 | -4.242514 | 0.400797  | 1.864594  |
| 7 | -2.861966 | 0.926615  | 1.801904  |
| 6 | -1.871514 | 0.180106  | 1.302915  |
| 7 | -2.122999 | -1.056461 | 0.804326  |
| 6 | -3.376417 | -1.797215 | 1.106692  |
| 6 | -2.591702 | 2.284311  | 2.320008  |
| 6 | -1.550171 | 2.953850  | 1.432410  |
| 6 | -0.283967 | 2.109875  | 1.433036  |
| 7 | -0.592741 | 0.665118  | 1.277756  |
| 6 | -1.248861 | -1.717230 | -0.192530 |
| 7 | -0.653053 | -0.817477 | -1.160746 |
| 6 | -1.367249 | -0.565292 | -2.433350 |
| 6 | -0.556663 | -1.177442 | -3.570047 |
| 6 | 0.817280  | -0.518936 | -3.587191 |
| 7 | 1.359058  | -0.269135 | -2.225198 |
| 6 | 0.678614  | -0.515439 | -1.100541 |
| 7 | 1.287924  | -0.448152 | 0.109390  |
| 6 | 2.769811  | -0.396461 | 0.145694  |
| 6 | 3.249603  | 0.642513  | -0.860867 |
| 6 | 2.751262  | 0.247785  | -2.244260 |
| 6 | 0.542735  | -0.232372 | 1.373552  |
| 1 | -5.203555 | -1.509218 | 2.194545  |
| 1 | -3.756455 | -1.244856 | 3.168902  |
| 1 | -4.758464 | 0.950022  | 2.654337  |
| 1 | -4.760097 | 0.602660  | 0.918283  |
| 1 | -3.104245 | -2.808432 | 1.427960  |
| 1 | -3.950432 | -1.882392 | 0.175853  |
| 1 | -2.261339 | 2.226397  | 3.364756  |
| 1 | -3.536721 | 2.829852  | 2.295121  |
| 1 | -1.315757 | 3.954828  | 1.805421  |
| 1 | -1.949525 | 3.065609  | 0.418380  |
| 1 | 0.256427  | 2.236458  | 2.378801  |
| 1 | 0.387925  | 2.404020  | 0.619318  |
| 1 | -1.899195 | -2.413280 | -0.728292 |
| 1 | -0.473702 | -2.319951 | 0.284421  |
| 1 | -1.492676 | 0.514936  | -2.569167 |
| 1 | -2.361751 | -1.006451 | -2.351770 |
| 1 | -1.046301 | -1.014212 | -4.534486 |
| 1 | -0.474025 | -2.259765 | -3.422161 |
| 1 | 0.775400  | 0.452832  | -4.092213 |
| 1 | 1.547090  | -1.136337 | -4.120943 |
| 1 | 3.170746  | -1.390505 | -0.082160 |
| 1 | 3.074543  | -0.146588 | 1.163091  |
| 1 | 4.342135  | 0.693975  | -0.872505 |
| 1 | 2.878410  | 1.633216  | -0.575978 |
| 1 | 3.378354  | -0.542249 | -2.673057 |
| 1 | 2.775650  | 1.098025  | -2.933644 |
| 1 | 0.226765  | -1.175495 | 1.821564  |
| 1 | 1.262300  | 0.216314  | 2.062068  |

**Optimized coordinates for transition-state (green)**

|   |           |           |           |
|---|-----------|-----------|-----------|
| 6 | -2.040040 | -2.485834 | -0.287545 |
| 6 | -2.635830 | -2.508056 | 1.107978  |
| 7 | -1.162507 | -1.276896 | -0.409882 |
| 6 | -3.514566 | -1.272188 | 1.223176  |
| 6 | 0.195370  | -1.756699 | -0.797943 |
| 6 | -1.810158 | -0.093708 | -0.205239 |
| 7 | 1.472644  | -1.005113 | -0.856110 |
| 7 | -3.008899 | -0.131331 | 0.415445  |
| 7 | -1.337663 | 1.104672  | -0.642142 |
| 6 | 2.583955  | -1.966598 | -1.108789 |
| 6 | 1.839796  | 0.124358  | -0.175699 |
| 6 | -0.030520 | 1.237623  | -1.253277 |
| 6 | -3.974206 | 0.997679  | 0.423749  |
| 6 | -2.058648 | 2.352091  | -0.289314 |
| 6 | 3.258888  | -2.300249 | 0.216218  |
| 7 | 3.009538  | 0.179668  | 0.468395  |
| 6 | -3.546868 | 2.130543  | -0.489530 |
| 7 | 1.049857  | 1.216434  | -0.274877 |
| 6 | 3.846275  | -1.009779 | 0.774458  |
| 6 | 3.595930  | 1.448292  | 0.971201  |
| 6 | 1.379362  | 2.444740  | 0.480103  |
| 6 | 2.884694  | 2.672815  | 0.414814  |
| 1 | 2.169535  | -2.847734 | -1.601173 |
| 1 | -1.440186 | -3.372629 | -0.489291 |
| 1 | 0.139762  | 0.458081  | -1.994282 |
| 1 | -4.946851 | 0.593275  | 0.125488  |
| 1 | 0.083026  | -2.187102 | -1.798351 |
| 1 | -0.008933 | 2.196563  | -1.773498 |
| 1 | -3.236438 | -3.408351 | 1.266377  |
| 1 | -4.521822 | -1.488775 | 0.852606  |
| 1 | -4.064775 | 1.344111  | 1.460044  |
| 1 | -1.685516 | 3.136116  | -0.950674 |
| 1 | -1.836433 | 2.641607  | 0.746042  |
| 1 | 4.056918  | -3.035867 | 0.080404  |
| 1 | -2.815880 | -2.431772 | -1.059303 |
| 1 | 2.531142  | -2.738895 | 0.909115  |
| 1 | -3.748182 | 1.893820  | -1.539419 |
| 1 | -1.833787 | -2.510806 | 1.853758  |
| 1 | -4.108398 | 3.034783  | -0.238707 |
| 1 | -3.611136 | -0.929407 | 2.259278  |
| 1 | 4.829328  | -0.815825 | 0.332110  |
| 1 | 4.654518  | 1.449556  | 0.694188  |
| 1 | 3.976050  | -1.055378 | 1.860984  |
| 1 | 3.280503  | -1.499114 | -1.811831 |
| 1 | 3.540649  | 1.421716  | 2.065788  |
| 1 | 0.834034  | 3.270521  | 0.019551  |
| 1 | 1.032704  | 2.348311  | 1.515921  |
| 1 | 3.184564  | 2.860075  | -0.621786 |
| 1 | 3.164997  | 3.551213  | 1.002993  |
| 1 | 0.379196  | -2.580311 | -0.098295 |

ORTEP for  $[H_2C(hpp)_2CH_2][BPh_4]_2$  (2b)

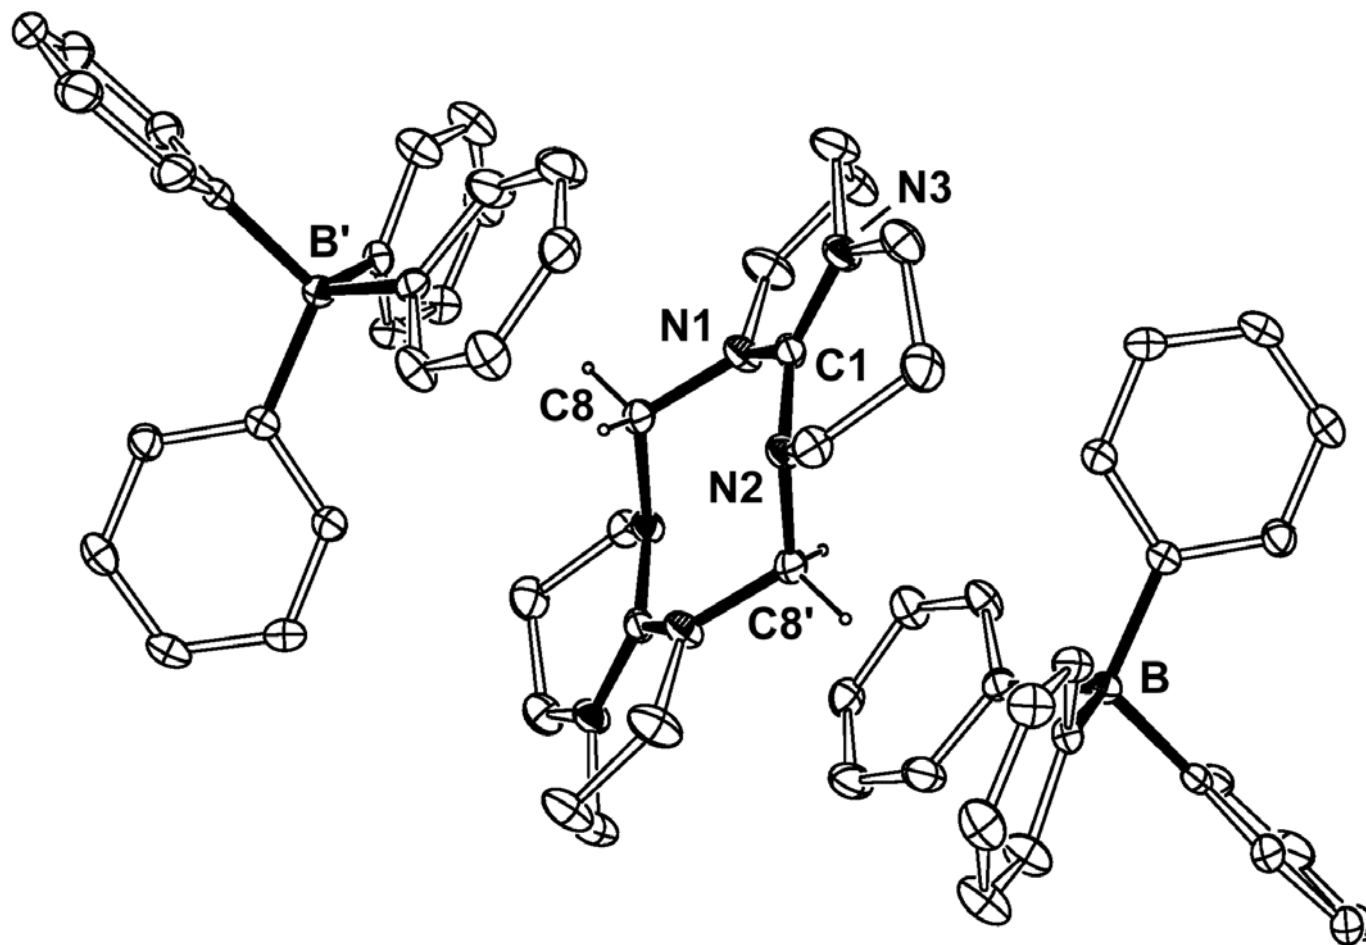



ORTEP for  $[H_2C\{hppCH_2Ph\}_2][BPh_4]_2$  (4b)

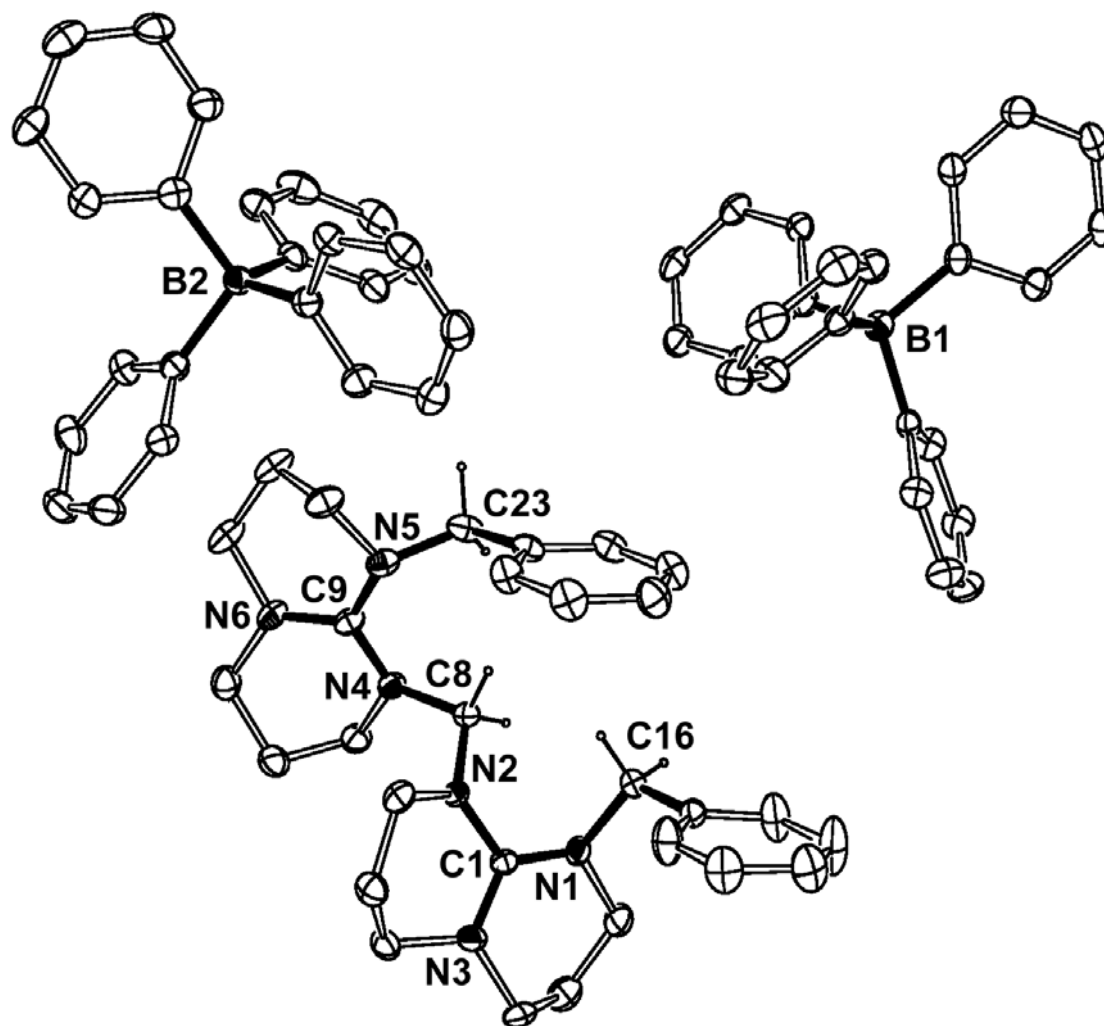

**<sup>1</sup>H NMR [H<sub>2</sub>C{hpp}<sub>2</sub>CH<sub>2</sub>] [Cl]<sub>2</sub> (2a-H<sub>2</sub>): D<sub>2</sub>O, 298K, 300 MHz**

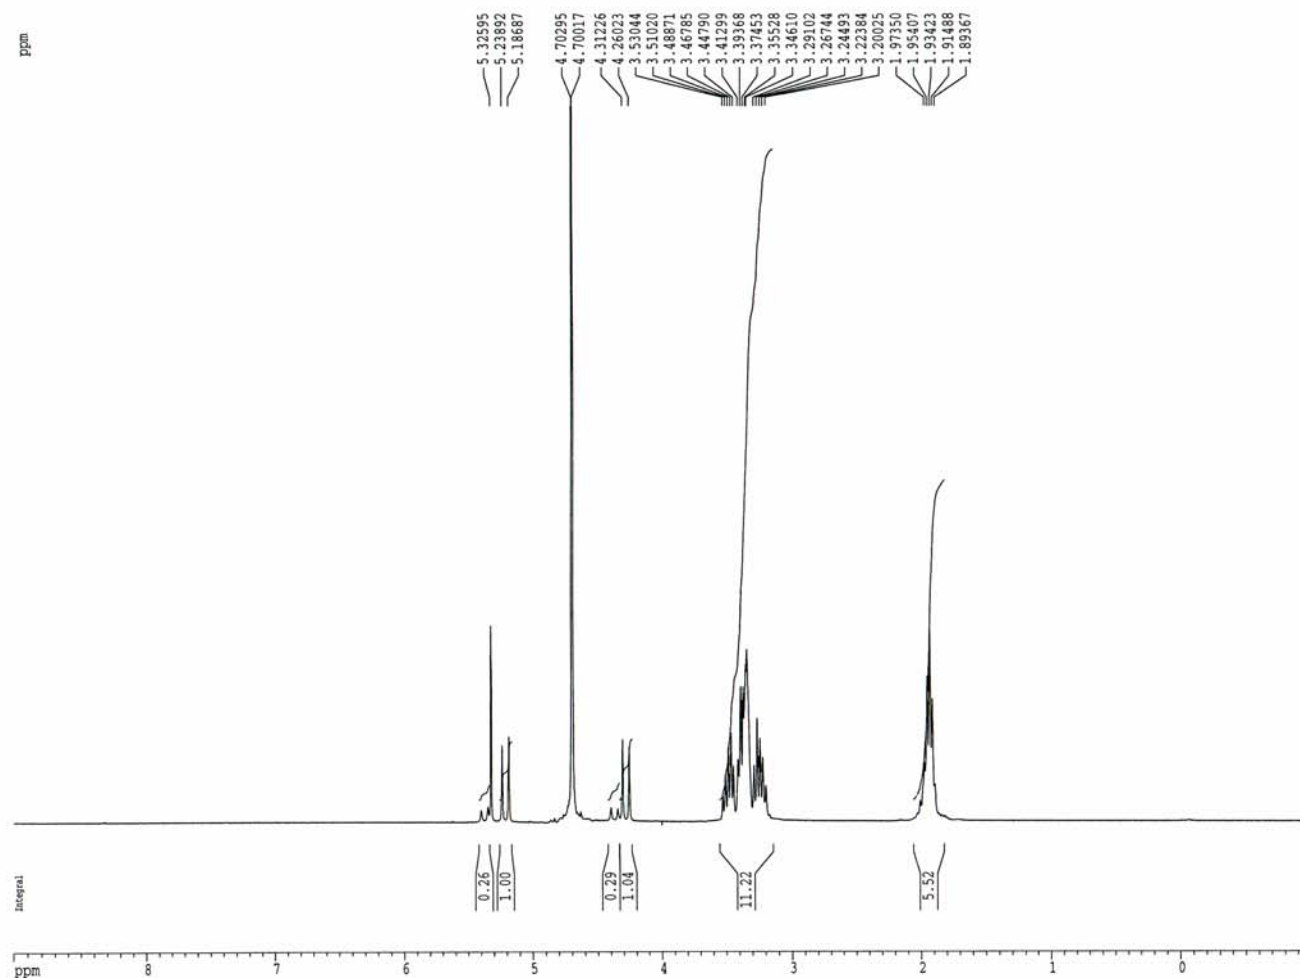

Current Data Parameters  
 NAME MPCDec28aa  
 EXPNO 1  
 PROCNO 1

F2 - Acquisition Parameters  
 Date\_ 20041228  
 Time 10.01  
 INSTRUM spect  
 PROBHD 5mm QUAD 1H/13  
 PULPROG zg30  
 TD 32768  
 SOLVENT C6D6  
 NS 8  
 DS 2  
 SWH 3612.717 Hz  
 FIDRES 0.110251 Hz  
 AQ 4.5351410 sec  
 RG 322.5  
 DW 138.400 usec  
 DE 5.50 usec  
 TE 300.0 K  
 D1 1.00000000 sec

===== CHANNEL f1 =====  
 NUC1 1H  
 P1 10.50 usec  
 PL1 -6.00 dB  
 SFO1 300.1312000 MHz

F2 - Processing parameters  
 SI 16384  
 SF 300.1299986 MHz  
 WDW EM  
 SSB 0  
 LB 0.30 Hz  
 GB 0  
 PC 1.00

1D NMR plot parameters  
 CX 30.00 cm  
 F1P 9.000 ppm  
 F1 2701.17 Hz  
 F2P -1.000 ppm  
 F2 -300.13 Hz  
 PPMCM 0.33333 ppm/cm  
 HZCM 100.04333 Hz/cm

**$^{13}\text{C}$  NMR [ $\text{H}_2\text{C}\{\text{hpp}\}_2\text{CH}_2$ ] [ $\text{Cl}$ ] $_2$  (2a-H $_2$ ):  $\text{D}_2\text{O}$ , 298K, 125 MHz**

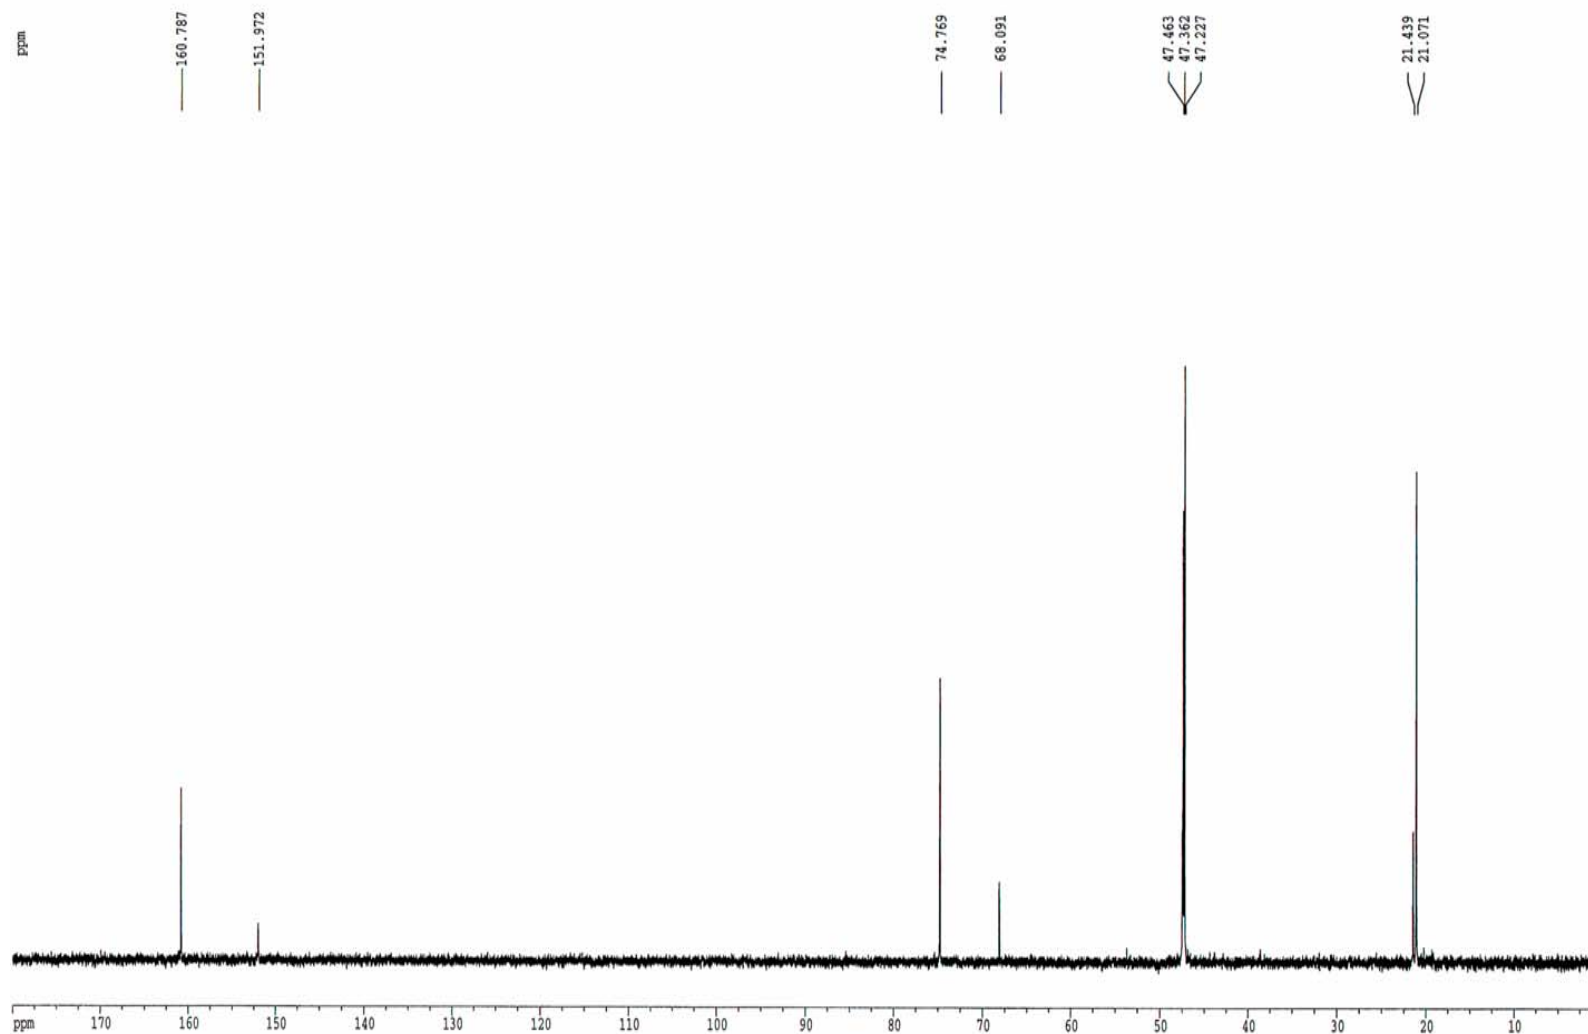

**$^1\text{H}$  NMR  $[\text{H}_2\text{C}\{\text{hpp}\}_2\text{CH}_2]$   $[\text{BPh}_4]_2$  (2b):  $\text{CD}_3\text{CN}$ , 298K, 300 MHz**

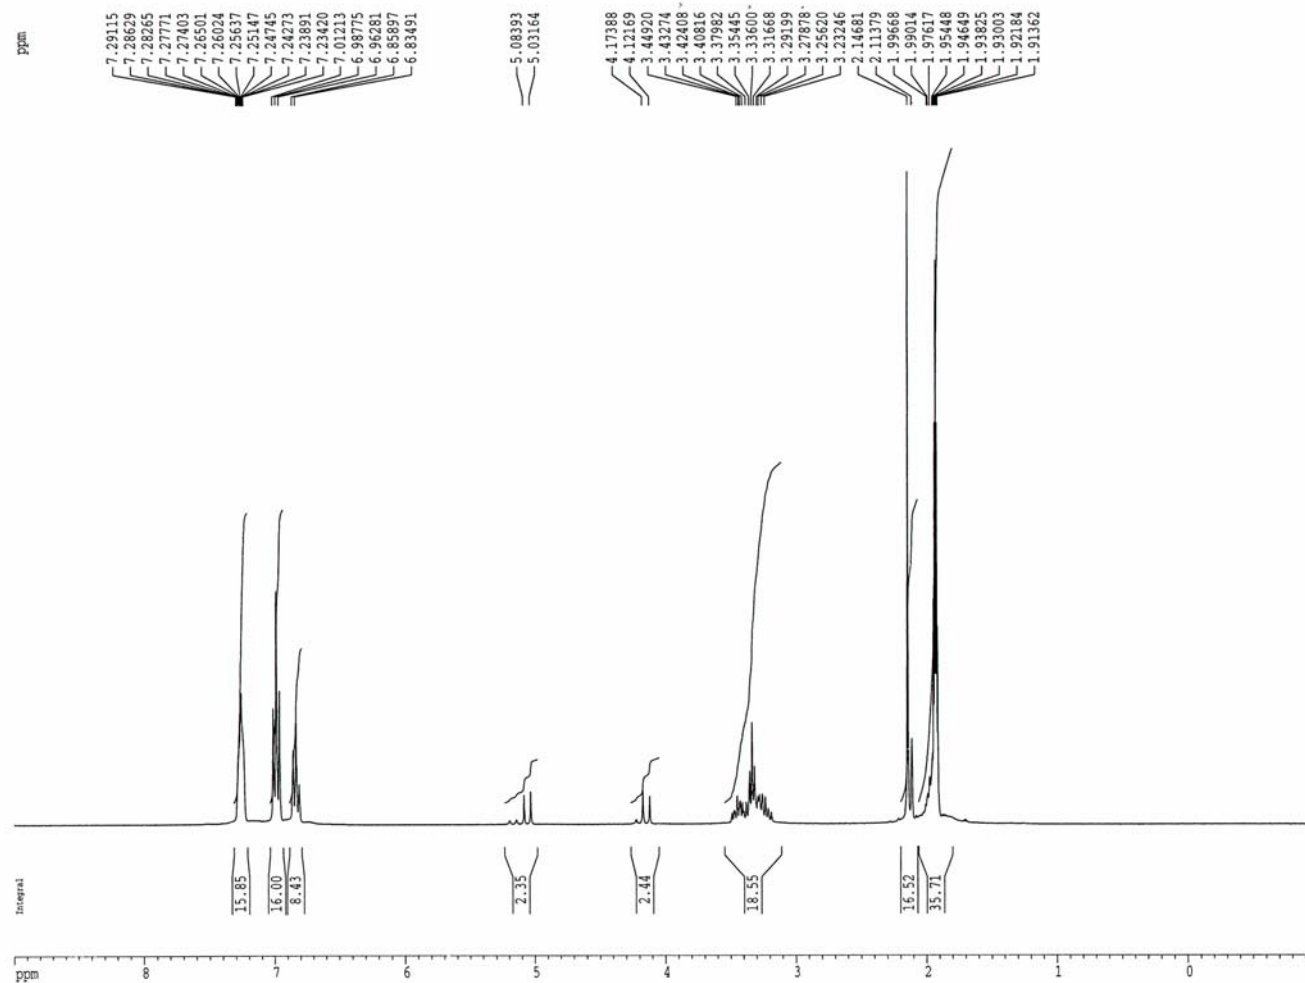

Current Data Parameters  
 NAME MPC433a  
 EXPNO 1  
 PROCNO 1

F2 - Acquisition Parameters  
 Date\_ 20051109  
 Time 7.16  
 INSTRUM spect  
 PROBHD 5mm QUAD 1H/13  
 PULPROG zg30  
 TD 32768  
 SOLVENT C6D6  
 NS 32  
 DS 2  
 SWH 3612.717 Hz  
 FIDRES 0.110251 Hz  
 AQ 4.5351410 sec  
 RG 352  
 DW 138.400 usec  
 DE 5.50 usec  
 TE 300.0 K  
 D1 1.00000000 sec

===== CHANNEL f1 =====  
 NUC1 1H  
 P1 10.50 usec  
 PL1 -6.00 dB  
 SFO1 300.1312000 MHz

F2 - Processing parameters  
 SI 16384  
 SF 300.1300104 MHz  
 WDW EM  
 SSB 0  
 LB 0.30 Hz  
 GB 0  
 PC 1.00

1D NMR plot parameters  
 CX 30.00 cm  
 F1P 9.000 ppm  
 F1 2701.17 Hz  
 F2P -1.000 ppm  
 F2 -300.13 Hz  
 PPMCM 0.33333 ppm/cm  
 HZCM 100.04333 Hz/cm

**$^{13}\text{C}$  NMR [ $\text{H}_2\text{C}\{\text{hpp}\}_2\text{CH}_2$ ] [ $\text{BPh}_4$ ] $_2$  (2b):  $\text{CD}_3\text{CN}$ , 333K, 75 MHz**

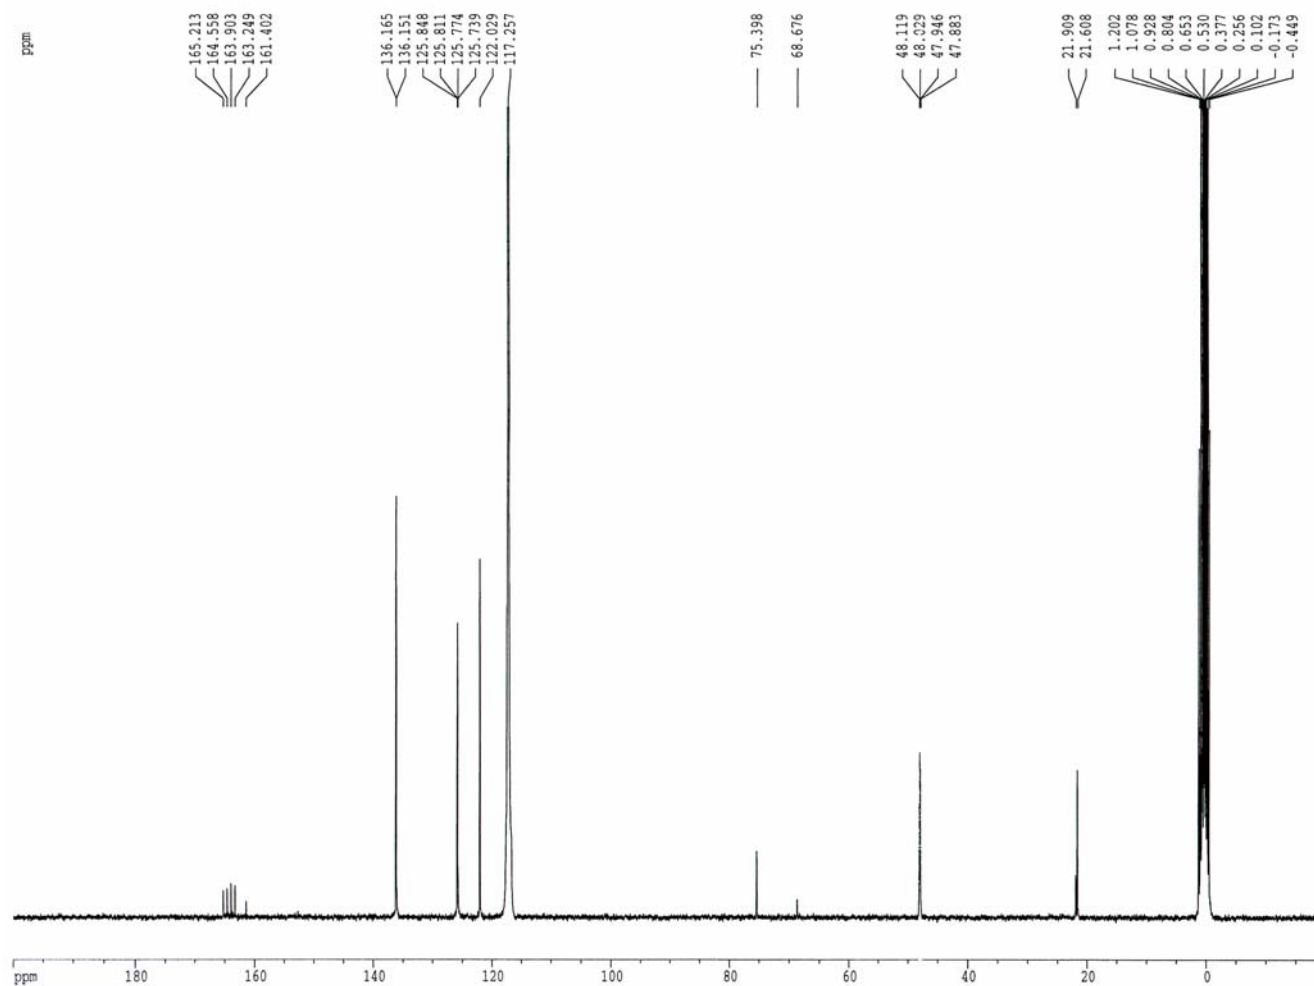

Current Data Parameters  
 NAME MPC433a  
 EXPNO 13  
 PROCNO 1

F2 - Acquisition Parameters  
 Date\_ 20051121  
 Time 6.56  
 INSTRUM spect  
 PROBHD 5mm QUAD 1H/13  
 PULPROG zgpg30  
 TD 65536  
 SOLVENT C6D6  
 NS 26265  
 DS 2  
 SWH 19267.822 Hz  
 FIDRES 0.294004 Hz  
 AQ 1.7007092 sec  
 RG 4597.6  
 DW 25.950 usec  
 DE 5.50 usec  
 TE 300.0 K  
 D1 1.00000000 sec  
 D11 0.03000000 sec  
 D12 0.00002000 sec

===== CHANNEL f1 =====  
 NUC1 13C  
 P1 5.50 usec  
 PL1 -6.00 dB  
 SFO1 75.4752690 MHz

===== CHANNEL f2 =====  
 CPDPRG2 waltz16  
 NUC2 1H  
 PCPD2 100.00 usec  
 PL2 -6.00 dB  
 PL12 17.00 dB  
 PL13 19.00 dB  
 SFO2 300.1312005 MHz

F2 - Processing parameters  
 SI 32768  
 SF 75.4677248 MHz  
 WDW EM  
 SSB 0  
 LB 1.00 Hz  
 GB 0  
 PC 1.40

1D NMR plot parameters  
 CX 30.00 cm  
 FIP 200.000 ppm  
 F1 15093.55 Hz  
 F2P -20.000 ppm  
 F2 -1509.35 Hz  
 PPMCM 7.33333 ppm/cm  
 HZCM 553.42999 Hz/cm

<sup>1</sup>H NMR [H<sub>2</sub>C{hppMe}<sub>2</sub>] [I]<sub>2</sub> (3): D<sub>2</sub>O, 298K, 300 MHz

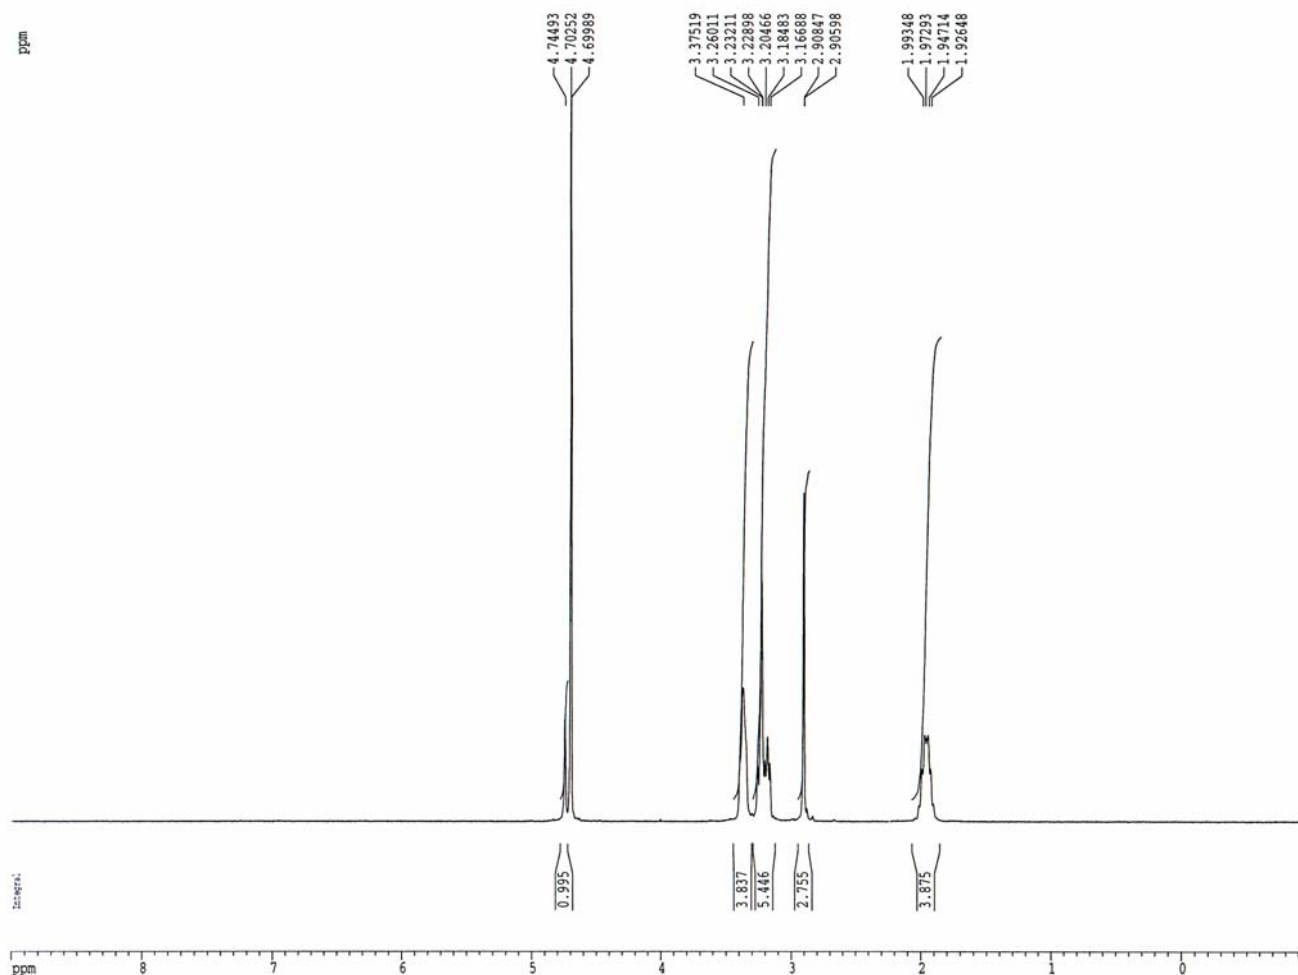

Current Data Parameters  
NAME MPC2004  
EXPNO 1  
PROCNO 1

F2 - Acquisition Parameters  
Date\_ 20041217  
Time 12.07  
INSTRUM spect  
PROBHD 5mm QUAD 1H/13  
PULPROG zg30  
TD 32768  
SOLVENT C6D6  
NS 8  
DS 2  
SWH 3612.717 Hz  
FIDRES 0.110251 Hz  
AQ 4.5351410 sec  
RG 912.3  
DW 138.400 usec  
DE 5.50 usec  
TE 300.0 K  
D1 1.00000000 sec

===== CHANNEL f1 =====  
NUC1 1H  
P1 10.50 usec  
PL1 -6.00 dB  
SFO1 300.1312000 MHz

F2 - Processing parameters  
SI 16384  
SF 300.1299971 MHz  
WDW EM  
SSB 0  
LB 0.30 Hz  
GB 0  
PC 1.00

1D NMR plot parameters  
CX 30.00 cm  
FLP 9.000 ppm  
F1 2701.17 Hz  
F2P -1.000 ppm  
F2 -300.13 Hz  
PPMCM 0.33333 ppm/cm  
HZCM 100.04333 Hz/cm

**<sup>13</sup>C NMR [H<sub>2</sub>C{hppMe<sub>2</sub>}<sub>2</sub>] [I]<sub>2</sub> (3): D<sub>2</sub>O, 298K, 75 MHz (+ DEPT 135)**

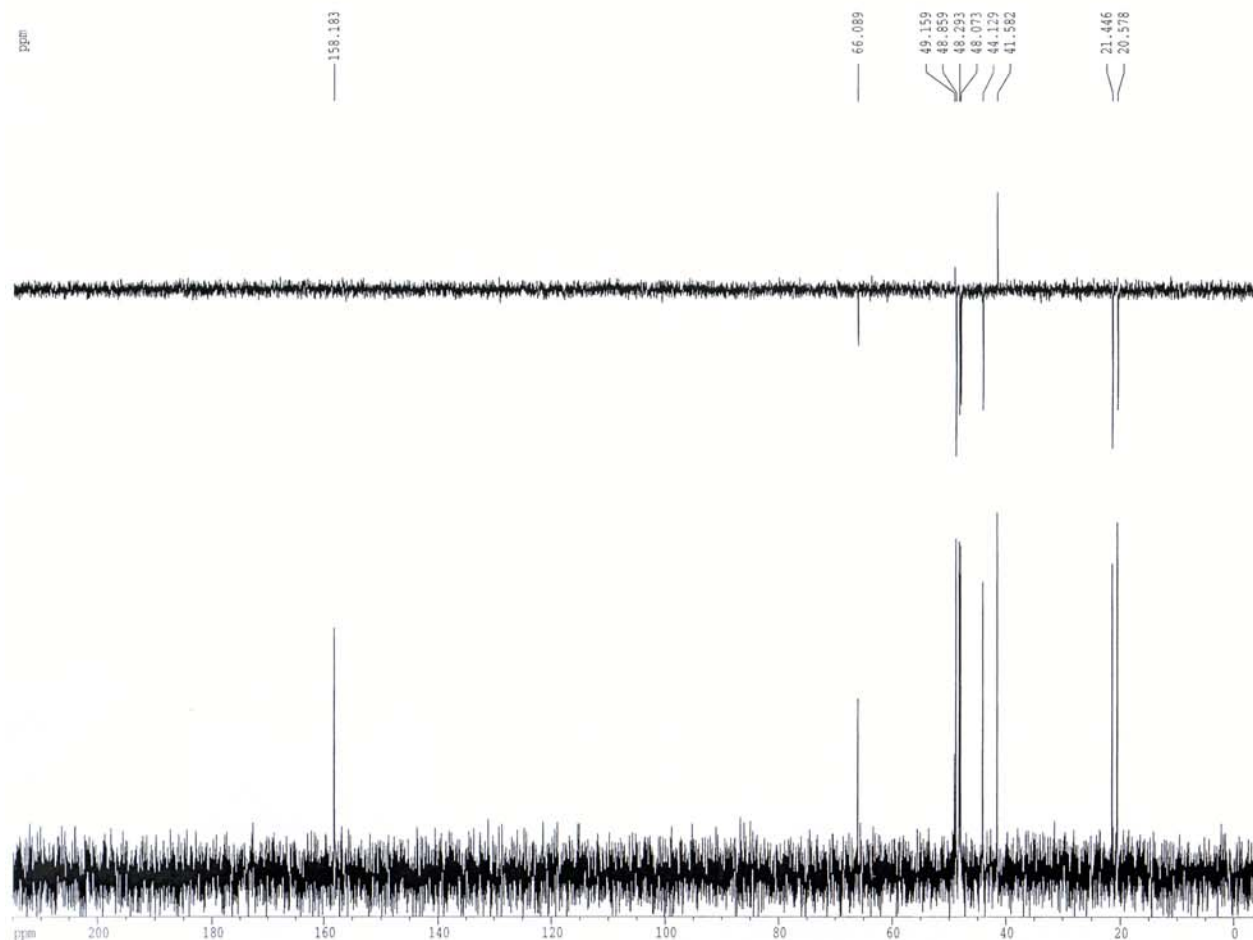

```

Current Data Parameters
NAME          Martyn
EXPNO         11
PROCNO        1

F2 - Acquisition Parameters
Date_         20041217
Time          17.06
INSTRUM       spect
PROBHD        dual

PULPROG       zgpg30
TD            65536
SOLVENT       D2O
NS            256
DS            4
SWH           18832.393 Hz
FIDRES        0.287360 Hz
AQ            1.7400308 sec
RG            8192
DW            26.550 usec
DE            6.00 usec
TE            300.0 K
D1            2.00000000 sec
D11           0.03000000 sec
D12           0.00002000 sec

===== CHANNEL f1 =====
NUC1          13C
P1            5.50 usec
PL1           -3.00 dB
SF01          75.4760200 MHz

===== CHANNEL f2 =====
CPDPRG2       waltz16
NUC2          1H
PCPD2         100.00 usec
PL2           -6.00 dB
PL12          16.00 dB
PL13          18.00 dB
SFO2          300.1312005 MHz

F2 - Processing parameters
SI            32768
SF            75.4677190 MHz
WDW           EM
SSB           0
LB            1.00 Hz
GB            0
PC            1.40

1D NMR plot parameters
CX            30.00 cm
FIP           215.000 ppm
F1            16225.56 Hz
F2P           -5.000 ppm
F2            -377.34 Hz
PPMCM         7.33333 ppm/cm
HZCM          553.42993 Hz/cm
    
```

<sup>1</sup>H NMR [H<sub>2</sub>C{hppCH<sub>2</sub>Ph}<sub>2</sub>] [BPh<sub>4</sub>]<sub>2</sub> (4b): D<sub>6</sub>-acetone, 298K, 300 MHz

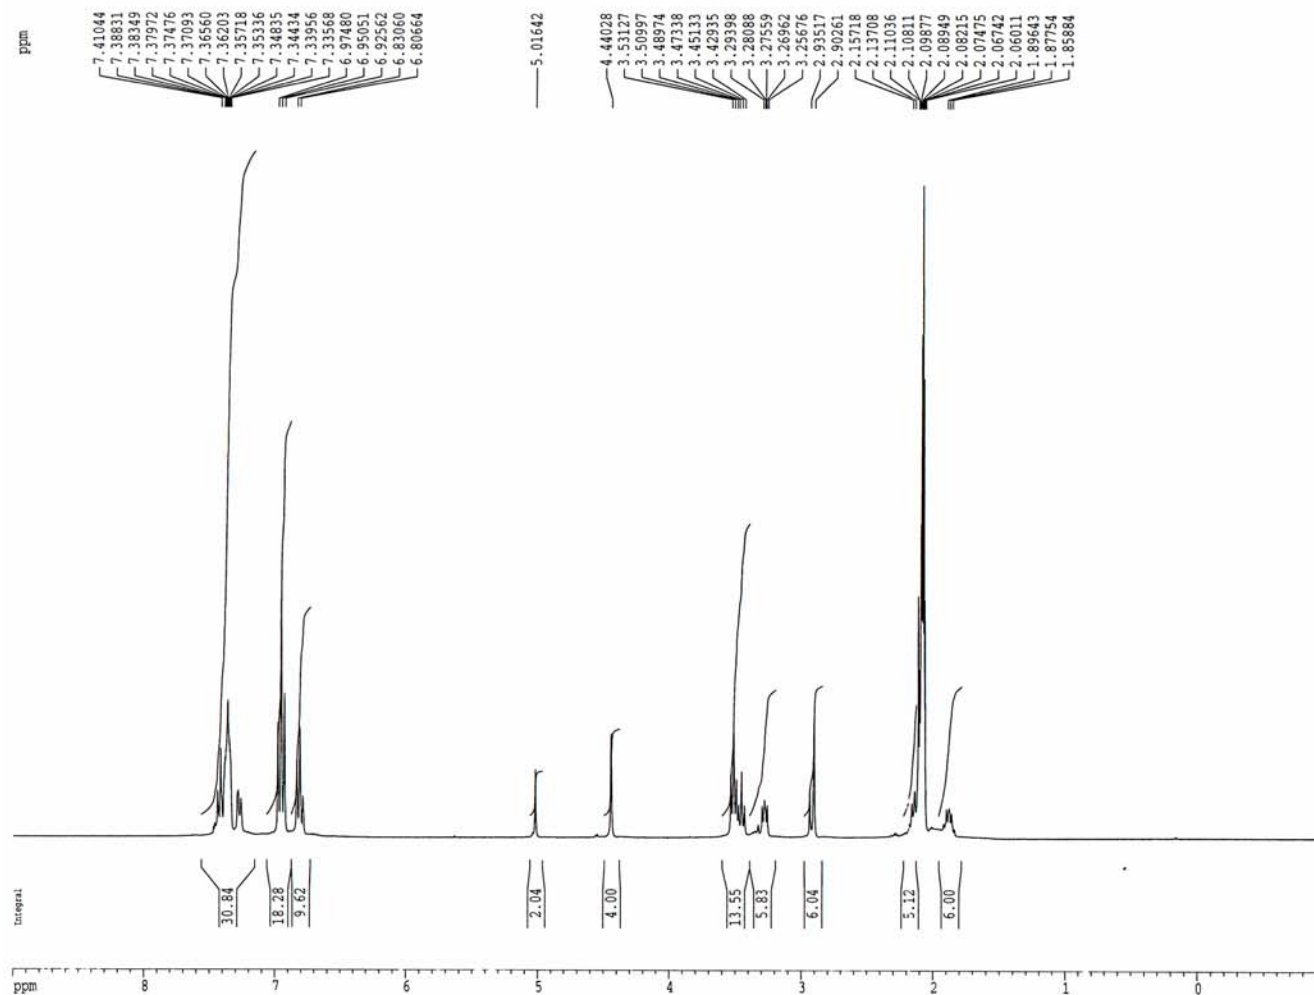

```

Current Data Parameters
NAME      MPC523e
EXPNO    1
PROCNO   1

F2 - Acquisition Parameters
Date_    20060709
Time     12.29
INSTRUM  spect
PROBHD   5mm QUAD 1H/13
PULPROG  zg30
TD       32768
SOLVENT  C6D6
NS       8
DS       2
SWH      3612.717 Hz
FIDRES   0.110251 Hz
AQ       4.5351410 sec
RG       143.7
DW       138.400 usec
DE       5.50 usec
TE       300.0 K
D1       1.000000000 sec

===== CHANNEL f1 =====
NUC1     1H
P1       10.50 usec
PL1      -6.00 dB
SFO1    300.1312000 MHz

F2 - Processing parameters
SI       16384
SF       300.1299966 MHz
WDW      EM
SSB      0
LB       0.30 Hz
GB       0
PC       1.00

1D NMR plot parameters
CX       30.00 cm
F1P      9.000 ppm
F1       2701.17 Hz
F2P      -1.000 ppm
F2       -300.13 Hz
PPMCM    0.33333 ppm/cm
HZCM     100.04333 Hz/cm
    
```



**$^{13}\text{C}$  NMR [ $\text{H}_2\text{C}\{\text{hppCH}_2\text{Ph}\}_2$ ] [ $\text{BPh}_4$ ] $_2$  (4b):  $\text{D}_6$ -acetone, 298K, 75 MHz**

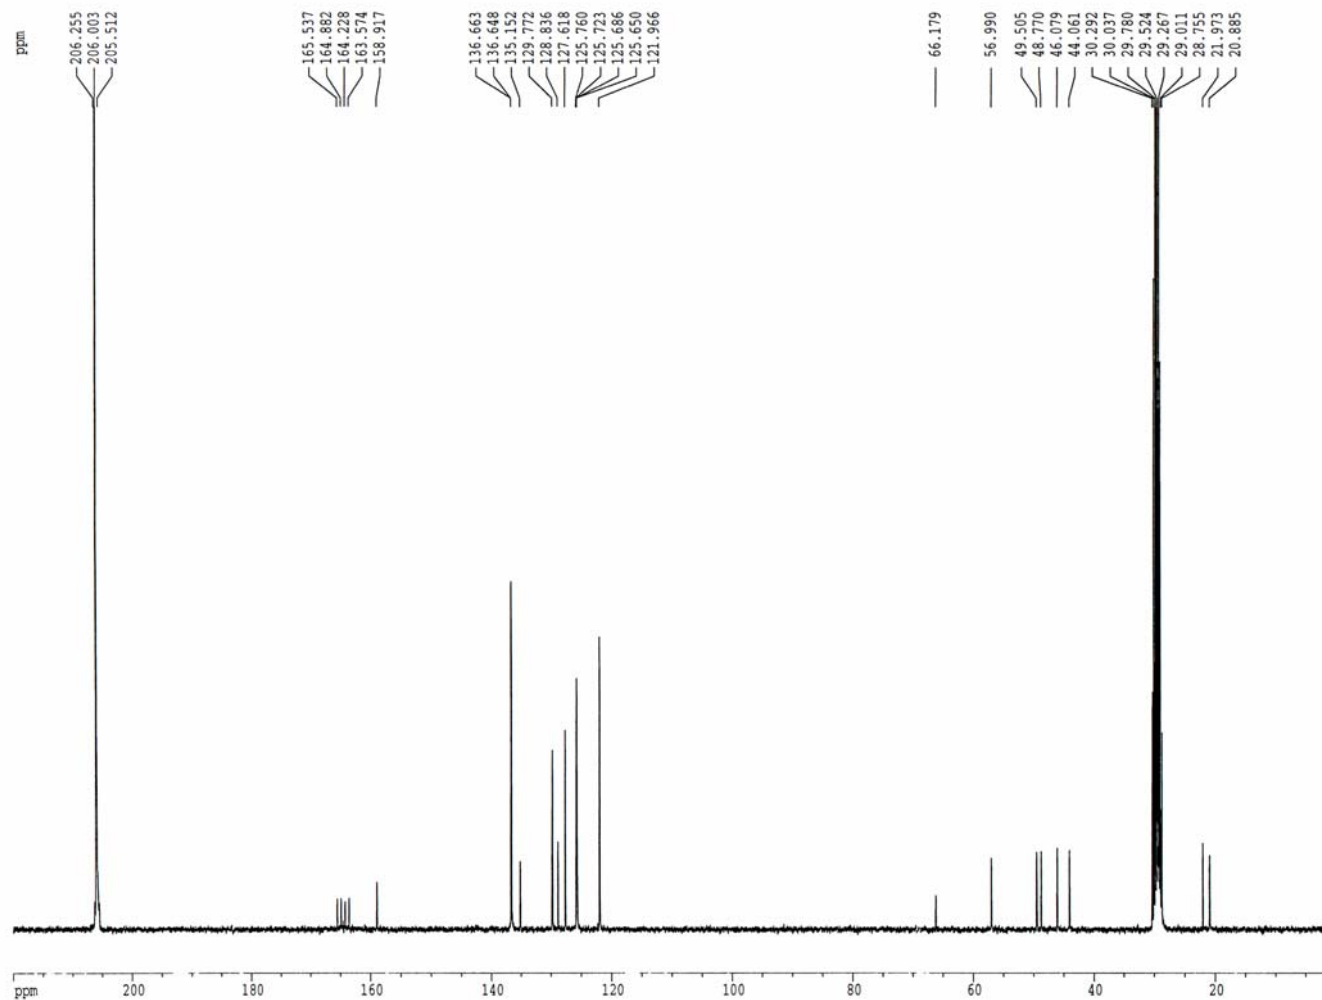

```

Current Data Parameters
NAME      MPC523e
EXPNO    13
PROCNO   1

F2 - Acquisition Parameters
Date_    20060709
Time     12.35
INSTRUM  spect
PROBHD   5mm QUAD 1H/13
PULPROG  zgpg30
TD       65536
SOLVENT  C6D6
NS       2509
DS       2
SWH      19267.822 Hz
FIDRES   0.294004 Hz
AQ       1.7007092 sec
RG       1625.5
DW       25.950 usec
DE       5.50 usec
TE       300.0 K
D1       1.00000000 sec
D11      0.03000000 sec
D12      0.00002000 sec

===== CHANNEL f1 =====
NUC1     13C
P1       5.50 usec
PL1      -6.00 dB
SFO1     75.4752690 MHz

===== CHANNEL f2 =====
CPDPRG2  waltz16
NUC2     1H
PCPD2    100.00 usec
PL2      -6.00 dB
PL12     17.00 dB
PL13     19.00 dB
SFO2     300.1312005 MHz

F2 - Processing parameters
SI       32768
SF       75.4677084 MHz
WDW      EM
SSB      0
LB       1.00 Hz
GB       0
PC       1.40

1D NMR plot parameters
CX       30.00 cm
FLP      220.000 ppm
F1       16602.89 Hz
F2P      0.00 ppm
F2       0.00 Hz
PFMCM    7.33333 ppm/cm
HZCM     553.42981 Hz/cm
    
```
